# Supplementary material for: Synergistic Anti-Tumor Effect of mTOR Inhibitors with Irinotecan on Colon Cancer Cells
Source: MDPI journal article supplement (doi:10.3390/cancers11101581), 2019-10-17
Supplement: s1 [file s1]

**Table S1.** Molecular characteristics of colon cell lines and PDX.

| <i>Samples</i>  | <i>MSI/MSS</i> | <i>KRAS</i>       | <i>HRAS</i> | <i>NRAS</i> | <i>BRAF</i>          | <i>PIK3CA</i>         | <i>PTEN</i> | <i>Others</i>                 |
|-----------------|----------------|-------------------|-------------|-------------|----------------------|-----------------------|-------------|-------------------------------|
| <b>Caco2</b>    | MSS            | WT                | WT          | WT          | WT                   | WT                    | WT          | WT                            |
| <b>SW480</b>    | MSS            | c.35G>T<br>p.G12V | WT          | WT          | WT                   | WT                    | WT          | WT                            |
| <b>HCT116</b>   | MSI            | c.38G>A<br>p.G13D | WT          | WT          | WT                   | c.3140A>G<br>p.H1047R | WT          | WT                            |
| <b>HT29</b>     | MSS            | WT                | WT          | WT          | c.1799T>A<br>p.V600E | c.1345C>A<br>p.P449T  | WT          | WT                            |
| <b>PDX 36M1</b> | MSS            | WT                | WT          | WT          | WT                   | WT                    | WT          | WT                            |
| <b>PDX 40</b>   | MSS            | WT                | WT          | WT          | WT                   | c.1633G>A<br>p.E545K  | WT          | ERBB2<br>c.2264T>C<br>p.L755S |

**Table S2.** Clinical parameters of human colon tumors used for patient-derived xenografts (PDX).

|                                | <b>PDX 36M1</b>                                                                   | <b>PDX 40</b>                                                                        |
|--------------------------------|-----------------------------------------------------------------------------------|--------------------------------------------------------------------------------------|
| <b>TNM</b>                     | pT3N2M1                                                                           | pT4N1M1                                                                              |
| <b>Stage</b>                   | IV                                                                                | IV                                                                                   |
| <b>Tumor location</b>          | Synchronous hepatic metastasis of a left colon tumor                              | Right colon                                                                          |
| <b>Metastasis localization</b> | Liver                                                                             | Liver                                                                                |
| <b>Sex</b>                     | M                                                                                 | F                                                                                    |
| <b>Age (years)</b>             | 74                                                                                | 77                                                                                   |
| <b>Treatment after surgery</b> | FOLFOX                                                                            | FOLFOX/FOLFIRI                                                                       |
| <b>Evolution</b>               | Disease progression after 6 months. Death related to cancer 2 years after surgery | Disease progression at hepatic level. Death related to cancer 6 months after surgery |

**Table S3.** List of genes and exons covered by the Tumor Hotspot MASTR Plus assay (Multiplicom/Agilent) used for NGS sequencing.

AKT1: NM\_005163.2, exon 3  
ALK: NM\_004304.4, exons 20 to 29  
BRAF: NM\_004333.5, exons 11 and 15  
CDKN2A: NM\_000077.4 (p16/INK4a) and NM\_058195.3 (p14/ARF), whole coding sequence (3 exons)  
CTNNB1: NM\_001904.3, exon 3  
DDR2: NM\_006182.3, whole coding sequence (16 exons)  
EGFR: NM\_005228.4, exons 18 to 21  
ERBB2/HER2: NM\_004448.3, exons 19, 20 and 21  
ERBB4/HER4: NM\_005235.2, exons 10 and 12  
FGFR2: NM\_000141.4, exons 7, 12 and 14  
FGFR3: NM\_000142.4, exons 7, 9, 14 and 16  
H3F3A: NM\_002107.4, exon 2  
HIST1H3B: NM\_003537.3, exon 1  
HRAS: NM\_005343.3, exons 2, 3 and 4  
IDH1: NM\_005896.3, exon 4  
IDH2: NM\_002168.3, exon 4  
KIT: NM\_000222.2, exons 8, 9, 10, 11, 13, 14, 17 and 18  
KRAS: NM\_033360.3, exons 2, 3 and 4  
MAP2K1/MEK1: NM\_002755.3, exons 2 and 3  
MET: NM\_001127500.2, exons 2, 10, 14 to 20  
NRAS: NM\_002524.4, exons 2, 3 and 4  
PDGFRA: NM\_006206.5, exons 12, 14 and 18  
PIK3CA: NM\_006218.3, exons 2, 3, 10, 11 and 21  
PIK3R1: NM\_181523.2, exons 11, 12 and 13  
PTEN: NM\_000314.6, whole coding sequence (9 exons)  
STK11/LKB1: NM\_000455.4, whole coding sequence (9 exons)
